# Supplementary material
Source: HighWire-hosted journal article supplement (http://qhc.bmj.com/highwire/filestream/157783/field_highwire_adjunct_files/0/bmjqs-2019-010368supp001_data_supplement.pdf)

## SUPPLEMENTAL TABLES/FIGURES

Supplemental Table 1: Current version of high (>92%) and low SpO2 delays used in alarm logic

| Saturation (%) | Monitor Alarm Delay (sec) | Middleware Delay (sec) | Total Delay (sec) | Alarm Acuity |
|----------------|---------------------------|------------------------|-------------------|--------------|
| > 92           | 300                       | 0                      | 300               | Medium       |
| 80-100         | 60                        | 0                      | 60                | Medium       |
| 70-79          | 30                        | 0                      | 30                | Medium       |
| 60-69          | 15                        | 0                      | 15                | Medium       |
| <60            | 0                         | 0                      | 0                 | High         |

“High” acuity refer to critical alarms requiring immediate attention, such as ventricular tachycardia.

“Medium” acuity refer to warning alarms requiring prompt attention, such as elevated heart rates.

“Low” acuity refers to advisory alarms, such as low ability to sense SpO2 or lead detachment.

Supplemental Table 2: Generation 2 non-alerting General Electric system alarms filtered by Connexall

|               |               |               |               |
|---------------|---------------|---------------|---------------|
| ACC VENT      | NBP MAX TIME  | NURSE CALL    | SENSOR        |
| ARTIFACT      | NBP MODULE    | PVC           | SPO2 ARTIFACT |
| BIGEMINY      | NBP OVER PRES | R ON T        | SPO2 PROBE    |
| CONNECT PROBE | NO BREATH     | RR LEADS FAIL | SPO2 SENSOR   |
| NBP FAIL      | NO ECG        | RSP HI        | SPO2M LO      |

Supplemental Table 3: Generation 3 non-alerting Philips system alarms filtered via Connexall

|                    |                   |                    |                    |
|--------------------|-------------------|--------------------|--------------------|
| !!Check Patient ID | AO No Transducer  | ARTs xx > yy       | CPP HI             |
| 3D Desat Idx 6     | AO Noisy Signal   | awRR xx < yy       | CPP Interrupted    |
| 3D Desat Idx 7     | AO Overrange      | awRR xx > yy       | CPP LOW            |
| A Lead Off         | AO Unplugged      | Batt Empty         | CPP Measure Failed |
| ABP Artifact       | AO Zero+Check Cal | Batt Incompat      | CPP No Pulse       |
| ABP Change Scale   | AoD HI            | Batt Low           | CPP No Transducer  |
| ABP Chk Sources    | AoD LOW           | Batt Malfunction   | CPP Noisy Signal   |
| ABP Cuff Overpress | AoD xx < yy       | Brady/P LO         | CPP Overrange      |
| ABP Deactivated    | AoD xx > yy       | Brady/P xx < yy    | CPP Unplugged      |
| ABP Disconnect     | AoM HI            | Cannot Analyze ECG | CPP xx < yy        |
| ABP Equip Malf     | AoM LOW           | Cannot Analyze QT  | CPP xx > yy        |
| ABP Interrupted    | AoM xx < yy       | Cannot Analyze ST  | CPP Zero+Check Cal |
| ABP Measure Failed | AoM xx > yy       | Cannot Analyze STE | Cuff Not Deflated  |
| ABP No Pulse       | AoS HI            | Charger Malfunc    | CVP Artifact       |
| ABP No Transducer  | AoS LOW           | Check ECG Source   | CVP Change Scale   |
| ABP Noisy Signal   | AoS xx < yy       | Check Equipment    | CVP Chk Sources    |
| ABP Overrange      | AoS xx > yy       | Check Keyboard     | CVP Cuff Overpress |
| ABP Unplugged      | ART Artifact      | Check Patient ID   | CVP Deactivated    |

Supplemental File 1

|                    |                    |                     |                    |
|--------------------|--------------------|---------------------|--------------------|
| ABP Zero+Check Cal | ART Change Scale   | Check Settings      | CVP Disconnect     |
| ABPd HI            | ART Chk Sources    | Check Touch Input   | CVP Equip Malf     |
| ABPd LOW           | ART Cuff Overpress | Check Touchscreen   | CVP Interrupted    |
| ABPd xx < yy       | ART Deactivated    | Check Watertrap     | CVP Measure Failed |
| ABPd xx > yy       | ART Disconnect     | Chk ECG Settings    | CVP No Pulse       |
| ABPm HI            | ART Equip Malf     | Chk ECG Sync Cable  | CVP No Transducer  |
| ABPm LOW           | ART Interrupted    | Chk MSL Connection  | CVP Noisy Signal   |
| ABPm xx < yy       | ART Measure Failed | Chk SyncOut Cable   | CVP Overrange      |
| ABPm xx > yy       | ART No Pulse       | CO2 Auto Zero       | CVP Unplugged      |
| ABPs HI            | ART No Transducer  | CO2 Change Scale    | CVP Zero+Check Cal |
| ABPs LOW           | ART Noisy Signal   | CO2 Deactivated     | CVPd HI            |
| ABPs xx < yy       | ART Overrange      | CO2 Equip Malf      | CVPd LOW           |
| ABPs xx > yy       | ART Unplugged      | CO2 No Tubing       | CVPd xx < yy       |
| Agent Mixture      | ART Zero+Check Cal | CO2 Occlusion       | CVPd xx > yy       |
| Align Watertrap    | ARTd HI            | CO2 Overrange       | CVPm HI            |
| AO Artifact        | ARTd LOW           | CO2 Pump Off        | CVPm LOW           |
| AO Change Scale    | ARTd xx < yy       | CO2 Purging         | CVPm xx < yy       |
| AO Chk Sources     | ARTd xx > yy       | CO2 Sens Warmup     | CVPm xx > yy       |
| AO Cuff Overpress  | ARTm HI            | CPP Artifact        | CVPs HI            |
| AO Deactivated     | ARTm LOW           | CPP Change Scale    | CVPs LOW           |
| AO Disconnect      | ARTm xx < yy       | CPP Chk Sources     | CVPs xx < yy       |
| AO Equip Malf      | ARTm xx > yy       | CPP Cuff Overpress  | CVPs xx > yy       |
| AO Interrupted     | ARTs HI            | CPP Deactivated     | dSpO2 Chk Sources  |
| AO Measure Failed  | ARTs LOW           | CPP Disconnect      | E Lead Off         |
| AO No Pulse        | ARTs xx < yy       | CPP Equip Malf      | ECG Check Cable    |
| ECG Noisy Elec LA  | ICPm xx > yy       | Meas, Deactivated   | No Data T-Mon      |
| ECG Noisy Elec LL  | ICPs HI            | Missed Beat         | Non-Sustain VT     |
| ECG Noisy Elec RA  | ICPs LOW           | MMS Ext, Unplugged  | P Unplugged        |
| ECG Noisy Elec V   | ICPs xx < yy       | MMS Ext, Unpowered  | P Artifact         |
| ECG NoisySignal    | ICPs xx > yy       | MMS Ext, Equip Malf | P Change Scale     |
| ECG Out Equip Malf | imCO2 xx < yy      | MMS Extension Malf  | P Chk Sources      |
| ECG/Arrh AlarmsOff | imCO2 xx > yy      | MMS Malf            | P Cuff Overpress   |
| EcgRsp Deactivated | Insert Battery     | MMS Msmf Malf       | P Deactivated      |
| Event:Sat LOW      | IPI Check Pat, Age | MMS Unplugged       | P Disconnect       |
| ExtBat Missing     | IPI Check Sources  | MMS Unsupported     | P Equip Malf       |
| FMS Unplugged      | IPI xx < yy        | MSL Power Overload  | P Interrupted      |
| FMS Unsupported    | IPI xx > yy        | Multiform PVCs      | P Measure Failed   |
| GM Alarm Suppress  | Irregular HR       | NBP Artifact        | P No Pulse         |
| GM Standby         | LA Lead Off        | NBP Change Scale    | P No Transducer    |
| GM Unplugged       | LAP Artifact       | NBP Chk Sources     | P Noisy Signal     |
| GM Warmup          | LAP Change Scale   | NBP Cuff Overpress  | P Overrange        |
| GM Zero Running    | LAP Chk Sources    | NBP Deactivated     | P Zero+Check Cal   |
| Grade ? Unknown    | LAP Cuff Overpress | NBP Disconnect      | Pacer Not Capt     |
| HR High            | LAP Deactivated    | NBP Equip Malf      | Pair PVCs          |
| HR Low             | LAP Disconnect     | NBP Interrupted     | PAP Artifact       |
| I Lead Off         | LAP Equip Malf     | NBP Measure Failed  | PAP Change Scale   |
| ICP Artifact       | LAP Interrupted    | NBP No Pulse        | PAP Chk Sources    |
| ICP Change Scale   | LAP Measure Failed | NBP No Transducer   | PAP Cuff Overpress |
| ICP Chk Sources    | LAP No Pulse       | NBP Noisy Signal    | PAP Deactivated    |
| ICP Cuff Overpress | LAP No Transducer  | NBP Overrange       | PAP Disconnect     |
| ICP Deactivated    | LAP Noisy Signal   | NBP Unplugged       | PAP Equip Malf     |
| ICP Disconnect     | LAP Overrange      | NBP Zero+Check Cal  | PAP Interrupted    |
| ICP Equip Malf     | LAP Unplugged      | NBPd High           | PAP Measure Failed |

Supplemental File 2

|                    |                    |                     |                    |
|--------------------|--------------------|---------------------|--------------------|
| ICP Interrupted    | LAP Zero+Check Cal | NBPd LOW            | PAP No Pulse       |
| ICP Measure Failed | LAPd HI            | NBPd xx < yy        | PAP No Transducer  |
| ICP No Pulse       | LAPd LOW           | NBPd xx > yy        | PAP Noisy Signal   |
| ICP No Transducer  | LAPd xx < yy       | NBPm High           | PAP Overrange      |
| ICP Noisy Signal   | LAPd xx > yy       | NBPm LOW            | PAP Unplugged      |
| ICP Overrange      | LAPm HI            | NBPm xx < yy        | PAP Zero+Check Cal |
| ICP Unplugged      | LAPm LOW           | NBPm xx > yy        | PAPd HI            |
| ICP Zero+Check Cal | LAPm xx < yy       | NBPs High           | PAPd LOW           |
| ICPd HI            | LAPm xx > yy       | NBPs LOW            | PAPd xx < yy       |
| ICPd LOW           | LAPs HI            | NBPs xx < yy        | PAPd xx > yy       |
| ICPd xx < yy       | LAPs LOW           | NBPs xx > yy        | PAPm HI            |
| ICPd xx > yy       | LAPs xx < yy       | No 3D Desat Index   | PAPm LOW           |
| ICPm HI            | LAPs xx > yy       | No Central Monit,   | PAPm xx < yy       |
| ICPm LOW           | Leadset Unplugged  | No Data Monitor     | PAPm xx > yy       |
| ICPm xx < yy       | LL Lead Off        | No Data Tele        | PAPs HI            |
| PAPs LOW           | RAPd xx > yy       | SpO2l ReplaceSensr  | SpO2r Searching    |
| PAPs xx < yy       | RAPm HI            | SpO2l Searching     | SpO2r Sensor Malf  |
| PAPs xx > yy       | RAPm LOW           | SpO2l Sensor Malf   | SpO2r Unplugged    |
| Pause              | RAPm xx < yy       | SpO2l Unplugged     | SpO2r xx < yy      |
| Pd xx < yy         | RAPm xx > yy       | SpO2l xx < yy       | SpO2r xx > yy      |
| Pd xx > yy         | RAPs HI            | SpO2l xx > yy       | ST High            |
| Perf High          | RAPs LOW           | SpO2po Chk Sensor   | ST Low             |
| Perf Low           | RAPs xx < yy       | SpO2po Chk Sources  | ST Multi aVF,I     |
| Perf xx < yy       | RAPs xx > yy       | SpO2po Equip Malf   | ST Multi aVF,II    |
| Perf xx > yy       | Repl, Tele Batt    | SpO2po Low          | ST Multi aVF,III   |
| Perfl xx < yy      | Resp Leads Off     | SpO2po Low Perf     | ST Multi aVL,I     |
| Perfl xx > yy      | RL Lead Off        | SpO2po No Pulse     | ST Multi aVL,II    |
| PerfPo xx < yy     | R-on-T PVCs        | SpO2po Poor Signal  | ST Multi aVL,III   |
| PerfPo xx > yy     | RR High            | SpO2po ReplaceSensr | ST Multi aVR,I     |
| PerfPr xx < yy     | RR Low             | SpO2po Searching    | ST Multi aVR,II    |
| PerfPr xx > yy     | RR xx > yy         | SpO2po Sensor Malf  | ST Multi aVR,III   |
| PPV bad ART Signal | Run PVCs High      | SpO2po Unplugged    | ST Multi I ,aVL    |
| PPV Chk Sources    | S Lead Off         | SpO2po xx < yy      | ST Multi I ,aVR    |
| Pulse High         | Some ECG AlarmsOff | SpO2po xx > yy      | ST Multi II ,aVF   |
| Pulse Low          | Speaker Malfunct   | SpO2poInterference  | ST Multi II ,aVR   |
| Pulse xx < yy      | SpO2 Chk Sensor    | SpO2pr Chk Sensor   | ST Multi III,aVF   |
| Pulse xx > yy      | SpO2 Chk Sources   | SpO2pr Chk Sources  | ST Multi III,aVR   |
| QT High            | SpO2 Equip Malf    | SpO2pr Equip Malf   | ST Multi V3 ,V4    |
| QT Low             | SpO2 High          | SpO2pr Low          | STE aVF ,I         |
| RA Lead Off        | SpO2 Interference  | SpO2pr Low Perf     | STE aVF ,II        |
| RAP Artifact       | SpO2 Low           | SpO2pr No Pulse     | STE aVF ,III       |
| RAP Change Scale   | SpO2 Low Perf      | SpO2pr Poor Signal  | STE aVL ,I         |
| RAP Chk Sources    | SpO2 No Pulse      | SpO2pr ReplaceSensr | STE aVL ,II        |
| RAP Cuff Overpress | SpO2 Poor Signal   | SpO2pr Searching    | STE aVL ,III       |
| RAP Deactivated    | SpO2 ReplaceSensr  | SpO2pr Sensor Malf  | STE aVR ,I         |
| RAP Disconnect     | SpO2 Searching     | SpO2pr Unplugged    | STE aVR ,II        |
| RAP Equip Malf     | SpO2 Sensor Malf   | SpO2pr xx < yy      | STE aVR ,III       |
| RAP Interrupted    | SpO2 Unplugged     | SpO2pr xx > yy      | STE I ,aVF         |
| RAP Measure Failed | SpO2 xx < yy       | SpO2prInterference  | STE I ,aVL         |
| RAP No Pulse       | SpO2 xx > yy       | SpO2r Chk Sensor    | STE I ,aVR         |
| RAP No Transducer  | SpO2l Chk Sensor   | SpO2r Chk Sources   | STE II ,aVF        |
| RAP Noisy Signal   | SpO2l Chk Sources  | SpO2r Equip Malf    | STE II ,aVL        |
| RAP Overrange      | SpO2l Equip Malf   | SpO2r Interference  | STE II ,aVR        |

Supplemental File 3

|                    |                    |                    |               |
|--------------------|--------------------|--------------------|---------------|
| RAP Unplugged      | SpO2l Interference | SpO2r Low          | STE III ,aVF  |
| RAP Zero+Check Cal | SpO2l Low          | SpO2r Low Perf     | STE III ,aVL  |
| RAPd HI            | SpO2l Low Perf     | SpO2r No Pulse     | STE III ,aVR  |
| RAPd LOW           | SpO2l No Pulse     | SpO2r Poor Signal  | ST-I xx < yy  |
| RAPd xx < yy       | SpO2l Poor Signal  | SpO2r ReplaceSensr | ST-I xx > yy  |
| ST-II xx < yy      | Tesoph xx > yy     | UAP No Pulse       | UVPs LOW      |
| ST-II xx > yy      | TesophNoTransducer | UAP No Transducer  | UVPs xx < yy  |
| ST-III xx < yy     | Tnaso Deactivated  | UAP Noisy Signal   | UVPs xx > yy  |
| ST-III xx > yy     | Tnaso Equip Malf   | UAP Overrange      | V Lead Off    |
| ST-MCL xx < yy     | Tnaso High         | UAP Unplugged      | V1 Lead Off   |
| ST-MCL xx > yy     | Tnaso Low          | UAP Zero+Check Cal | V2 Lead Off   |
| ST-V xx < yy       | Tnaso NoTransducer | UAPd HI            | V3 Lead Off   |
| ST-V xx > yy       | Tnaso Overrange    | UAPd LOW           | V4 Lead Off   |
| SyncOut Equip Malf | Tnaso xx < yy      | UAPd xx < yy       | V5 Lead Off   |
| Tachy/p High       | Tnaso xx > yy      | UAPd xx > yy       | V6 Lead Off   |
| Tachy/p xx > yy    | Trect Deactivated  | UAPm HI            | Vent Bigeminy |
| Tart Deactivated   | Trect Equip Malf   | UAPm LOW           |               |
| Tart Equip Malf    | Trect High         | UAPm xx < yy       |               |
| Tart High          | Trect Low          | UAPm xx > yy       |               |
| Tart Low           | Trect NoTransducer | UAPs HI            |               |
| Tart NoTransducer  | Trect Overrange    | UAPs LOW           |               |
| Tart Overrange     | Trect xx < yy      | UAPs xx < yy       |               |
| Tart xx < yy       | Trect xx > yy      | UAPs xx > yy       |               |
| Tart xx > yy       | Tskin Deactivated  | Unsupported LAN    |               |
| Tcore Deactivated  | Tskin Equip Malf   | UVP Artifact       |               |
| Tcore Equip Malf   | Tskin High         | UVP Change Scale   |               |
| Tcore High         | Tskin Low          | UVP Chk Sources    |               |
| Tcore Low          | Tskin NoTransducer | UVP Cuff Overpress |               |
| Tcore NoTransducer | Tskin Overrange    | UVP Deactivated    |               |
| Tcore Overrange    | Tskin xx < yy      | UVP Disconnect     |               |
| Tcore xx < yy      | Tskin xx > yy      | UVP Equip Malf     |               |
| Tcore xx > yy      | Tven Deactivated   | UVP Interrupted    |               |
| Tele Battery Low   | Tven Equip Malf    | UVP Measure Failed |               |
| TELE Weak Signal   | Tven High          | UVP No Pulse       |               |
| Temp Deactivated   | Tven Low           | UVP No Transducer  |               |
| Temp Equip Malf    | Tven NoTransducer  | UVP Noisy Signal   |               |
| Temp High          | Tven Overrange     | UVP Overrange      |               |
| Temp Low           | Tven xx < yy       | UVP Unplugged      |               |
| Temp NoTransducer  | Tven xx > yy       | UVP Zero+Check Cal |               |
| Temp Overrange     | UAP Artifact       | UVPd HI            |               |
| Temp xx < yy       | UAP Change Scale   | UVPd LOW           |               |
| Temp xx > yy       | UAP Chk Sources    | UVPd xx < yy       |               |
| Tesoph Deactivated | UAP Cuff Overpress | UVPd xx > yy       |               |
| Tesoph Equip Malf  | UAP Deactivated    | UVPm HI            |               |
| Tesoph High        | UAP Disconnect     | UVPm LOW           |               |
| Tesoph Low         | UAP Equip Malf     | UVPm xx < yy       |               |
| Tesoph Overrange   | UAP Interrupted    | UVPm xx > yy       |               |
| Tesoph xx < yy     | UAP Measure Failed | UVPs HI            |               |

Supplemental Table 4: Generation 3 Philips system alarms that alert after a 120 second delay implemented by Connexall

|                |                  |                   |                  |
|----------------|------------------|-------------------|------------------|
| ECG Leads Off  | SpO2l No Sensor  | SpO2po Sensor Off | SpO2r No Sensor  |
| SPO2 PROBE OFF | SpO2l Sensor Off | SpO2pr No Sensor  | SpO2r Sensor Off |
| SpO2 No Sensor | SpO2po No Sensor | SpO2pr Sensor Off |                  |

Supplemental Table 5: SAFE scoring algorithm used as monitoring parameter and balancing measure

| ACCU SAFE TOOL                                                          |        | Patient Label                                                                                                                                           |        |
|-------------------------------------------------------------------------|--------|---------------------------------------------------------------------------------------------------------------------------------------------------------|--------|
| Date:                                                                   | Time:  |                                                                                                                                                         |        |
| Room:                                                                   |        |                                                                                                                                                         |        |
| Nurse's Last Name:                                                      |        |                                                                                                                                                         |        |
| Watcher: YES NO                                                         |        |                                                                                                                                                         |        |
| Circle: Watcher/High Risk Therapy/Communication Concern/Family Concern  |        |                                                                                                                                                         |        |
| Circle: A. Single ventricle B. Post transplant                          |        |                                                                                                                                                         |        |
| C. Cardiomyopathy D. VAD                                                |        |                                                                                                                                                         |        |
| E. Other cardiac F. non-cardiac G. cath pt                              | Rating |                                                                                                                                                         | Rating |
| <b>Heart Rate/Rhythm:</b>                                               |        | <b>Behavioral Level of Consciousness/NOT RELATED TO HOSPITAL ANXIETY</b>                                                                                |        |
| Sinus rhythm or baseline rhythm, HR WNL or parameters                   | 0      | Relaxed, content, resting appropriately                                                                                                                 | 0      |
| Arrhythmias with stable VS & perfusion (reviewed by Fellow-no concern)  | 1      | Slightly anxious/slightly irritable                                                                                                                     | 1      |
| Persistent brady or tachy outside of baseline or ordered parameters     | 2      | Reassured by occasional touching, hugging, talking to, distractible                                                                                     |        |
| New/increased arrhythmias with fellow/RN heightened concerns            | 3      | Anxious, irritable, decreased activity                                                                                                                  | 2      |
| Arrhythmias with unstable VS or perfusion                               | 4      | Increasingly difficult to distract or console or stay asleep                                                                                            |        |
|                                                                         |        | Very Anxious, Very irritable                                                                                                                            | 3      |
|                                                                         |        | Unable to console, unable to rest, or increasing drowsiness                                                                                             |        |
| <b>Perfusion: (FOR VAD DEVICES)</b>                                     |        | Lethargic, confused                                                                                                                                     | 4      |
| Pink and/or cap refill ≤/≥ 2 seconds (FILL or FLOW at BASELINE)         | 0      | Minimally responsive or unresponsive to pain                                                                                                            |        |
| Pale and/or cap refill 3 seconds                                        | 1      |                                                                                                                                                         |        |
| Grey or cap refill > 4 seconds                                          | 2      |                                                                                                                                                         |        |
| Gray/mottled or cap refill >5 sec (DECR FILL OR FLOW, INCR POWER)       | 3      | <b>Concerns from pt., family (R/T DETERIORATING MEDICAL STATUS):</b>                                                                                    |        |
| Decreased peripheral pulses, cool to touch, cyanotic,                   | 4      | No Concerns or not present                                                                                                                              | 0      |
|                                                                         |        | Slight Concerns and/or Family not engaged                                                                                                               | 1      |
|                                                                         |        | Family with increasing concerns                                                                                                                         | 2      |
| <b>Respiratory Effort:</b>                                              |        | Family uncomfortable regarding concerns                                                                                                                 | 3      |
| Normal for age                                                          | 0      | Family very uncomfortable regarding concerns                                                                                                            | 4      |
| Resp. Rate MILDLY INCREASED YET EASY                                    | 1      |                                                                                                                                                         |        |
| Resp. Rate MODERATELY INCREASED YET EASY                                | 2      |                                                                                                                                                         |        |
| Resp. Rate increased with effort mild to moderately labored             | 3      | <b>Nursing Concerns FOR DETERIORATING MEDICAL STATUS</b>                                                                                                |        |
| Resp. Rate increased with effort moderate to severely labored           | 4      | <b>Rate 0 for no concerns</b>                                                                                                                           | 0      |
|                                                                         |        |                                                                                                                                                         | 1      |
|                                                                         |        |                                                                                                                                                         | 2      |
|                                                                         |        |                                                                                                                                                         | 3      |
| <b>Current Oxygen Therapy</b>                                           |        |                                                                                                                                                         |        |
| Room Air or stable on home oxygen dose                                  | 0      | <b>Rate 4 for highly concerned</b>                                                                                                                      | 4      |
| Oxygen use is stable or in process of weaning                           | 1      |                                                                                                                                                         |        |
| Intermittent episodes of O2 usage                                       | 2      |                                                                                                                                                         |        |
| New or Increased continuous oxygen requirement                          | 3      |                                                                                                                                                         |        |
| Unable to maintain ordered sats within reasonable O2 delivery           | 4      |                                                                                                                                                         |        |
|                                                                         |        | <b>FOR PATIENTS SCORING 7 OR ABOVE:</b>                                                                                                                 |        |
|                                                                         |        |                                                                                                                                                         |        |
| <b>GI Concerns</b>                                                      |        | <b>1. RESIDENT IS TO BE NOTIFIED that pt scored 7 or above each time scored and document that patient scored 7 or above and why in notification log</b> |        |
| No concerns, NPO for procedure, or tolerating PO/enteral feeds          | 0      |                                                                                                                                                         |        |
| Tolerating feeds, but unable to progress feeds or Poor appetite         | 1      | <b>2. RESIDENT IS TO EVALUATE PT.</b>                                                                                                                   |        |
| Vomiting some of feeds and/or complaints of nausea                      | 2      | <b>3. FOCUSED Q2H Vital Signs-- and chart</b>                                                                                                           |        |
| Vomiting ≥/≤ half of feeds (fussy with feeds), n/v &/or abd. distention | 3      | <b>4. FOCUSED Q2H Assessments-- and chart</b>                                                                                                           |        |
| Increasing abdom distention, increasing nausea/emesis, blood in stool   | 4      |                                                                                                                                                         |        |

Supplemental Figure 1: Current RN escalation algorithm

| Alarm Acuity | Initial Notification Recipients | Secondary Notification Recipients | Tertiary Notification Recipients                   |
|--------------|---------------------------------|-----------------------------------|----------------------------------------------------|
| High         | Primary RN<br>Charge RN         | Primary RN<br>Buddy RN            | All staff                                          |
| Medium       | Primary RN                      | Primary RN<br>Buddy RN            | Primary RN<br>Buddy RN<br>Resource RN<br>Charge RN |
| Low          | Primary RN                      | Primary RN<br>Buddy RN            | Primary RN<br>Buddy RN                             |

“High” acuity refer to critical alarms requiring immediate attention, such as ventricular tachycardia.  
 “Medium” acuity refer to warning alarms requiring prompt attention, such as elevated heart rates.  
 “Low” acuity refers to advisory alarms, such as low ability to sense SpO2 or lead detachment.

Supplemental Figure 2: Percentage of patients with ECG leads changed every 24 hours by week

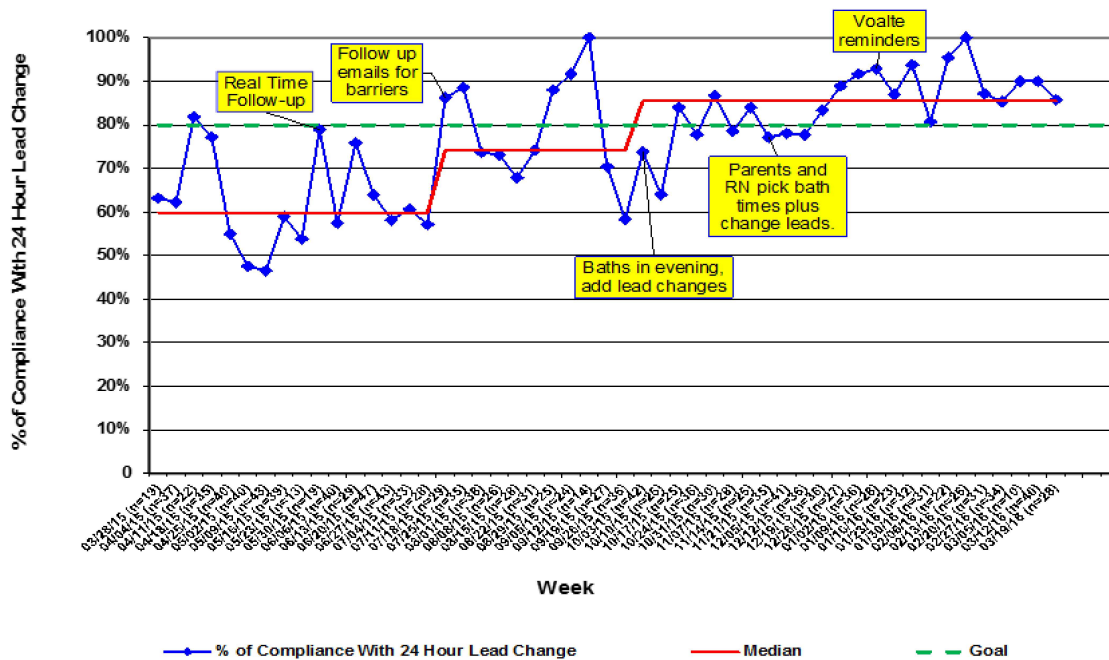

Supplemental Figure 3: Percent of SAFE scores greater than or equal to 4, per 10 patients, by month.

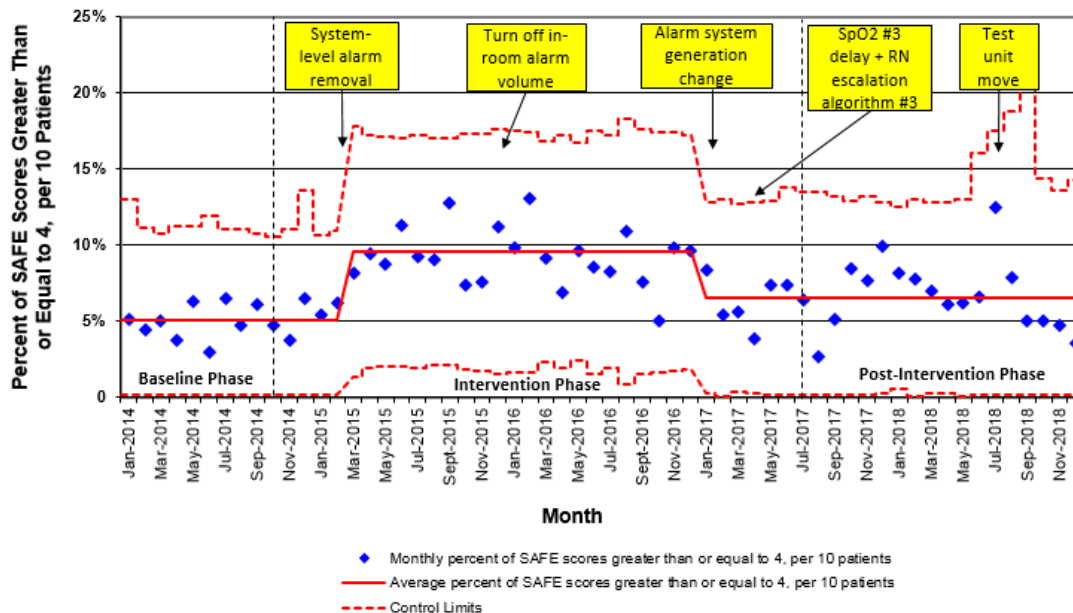

Supplemental Figure 4: METs and floor-to-ICU transfers per 1000 patient days by month.

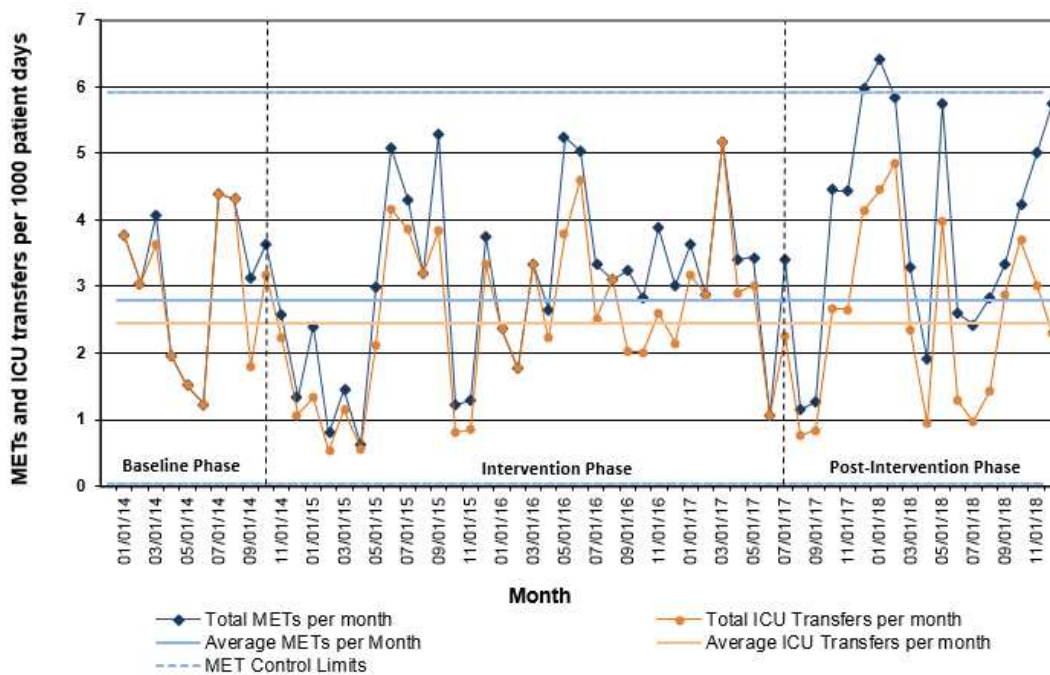

Supplement: bmjqs-2019-010368supp001_data_supplement.pdf [file bmjqs-2019-010368supp001_data_supplement.pdf]
